# Supplementary material
Source: PubMed Central journal article supplement (PMC3049195)
Supplement: NIHMS245303-supplement-1_si_001.pdf [file NIHMS245303-supplement-1_si_001.pdf]

## Supporting Information

### Reconstitution of Dipthine Synthase Activity *In Vitro*

Xuling Zhu, Jungwoo Kim, Xiaoyang Su, and Hening Lin\*

Department of Chemistry and Chemical Biology, Cornell University, Ithaca, New York, 14853

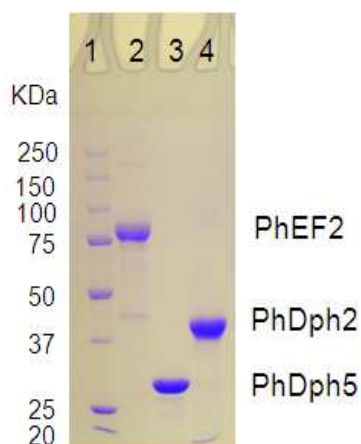

**Supplementary Figure 1.** Coomassie blue-stained gel showing the purified proteins used in the activity assay. 1, Protein marker; 2, PhEF2 (83 kDa); 3, PhDph5 (30 kDa); 4, PhDph2 (38 kDa)

**Supplementary Table 1.** Major observed masses in PhEF2 MALDI-MS spectra (Figure 2, 4, and 7) and the peptide fragments that correspond to the masses.

| peptide fragment                    | calculated $m/z$ | observed $m/z$ |
|-------------------------------------|------------------|----------------|
| LLDAQVHEDNVHR                       | 1545.78          | 1545.80        |
| LLDAQVHEDNVH(ACP)R                  | 1646.83          | 1646.84        |
| LLDAQVHEDNVH(ACP-Me)R               | 1660.84          | 1660.83        |
| LLDAQVHEDNVH(ACP-Me <sub>2</sub> )R | 1674.86          | 1674.84        |
| LLDAQVHEDNVH(3-carboxy-2-propenyl)R | 1629.80          | 1629.77        |
| QLVLDQFDEQEQR                       | 1590.78          | 1590.80        |
